# Supplementary material
Source: Springer Nature journal article supplement (https://www.springermedizin.de/resource/supplementary/12974_2013_921_MOESM3_ESM.pdf/9600360)

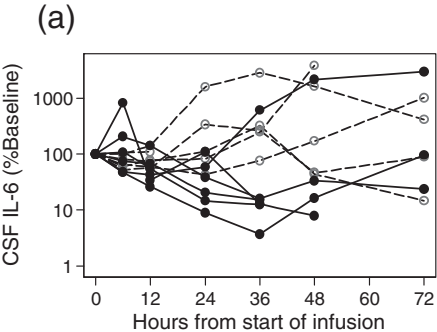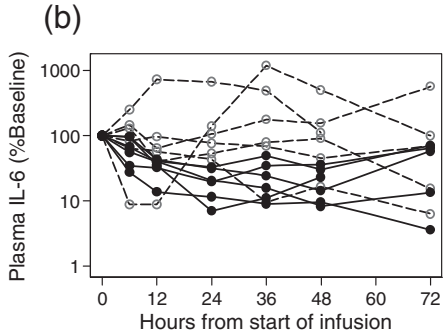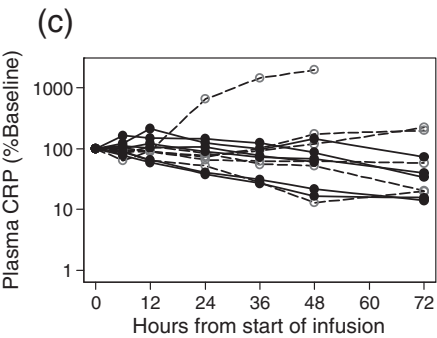

Supplement: MOESM3 [file 9600360]
